# Supplementary material for: A Specialized Microvascular Domain in the Mouse Neural Stem Cell Niche
Source: PubMed Central journal article supplement (PMC3538546; doi:10.1371/journal.pone.0053546), 2013-01-07
Supplement: pone.0053546.s005.pdf [file pone.0053546.s005.pdf]

```
function output = splitfilament

% splitfilament.m
%
% Copyright 2010-2012,
% Baylor College of Medicine
% All Rights Reserved
%
% Last modified 7/8/2012
%
% Uses a reference plane to divide a network of vessels into two separate
% networks. Vessel networks are defined as filament coordinates, using the
% format implemented by Imaris 7.4.2 (Bitplane). Filament coordinates can
% be exported using ImarisXT.
%
% Designed to use the margin between the SEZ and the Striatum in order to
% separate the two vessel networks, allowing for separate morphometric
% analyses.
%
% Assumes the reference plane is located at a depth of 10um below the
% ependymal wall, and that the SEZ is 20um thick.
%
% Inputs:
% -Directory containing filament coordinates that define reference plane
% -Directory containing vessel coordinates
%
% Outputs (one each for the SEZ, the Striatum, and the combination):
% -Filament coordinates for each subset of vessels (includes
% vFilamentXYZ, vFilamentRadius, vFilamentEdges, and vFilamentTypes).
% Each set is saved into its own subdirectory of the parent directory
% containing the vessel filament coordinates.
%

% Define directory containing vFilamentXYZ for filaments defining reference plane
directory_name1 = uigetdir('', 'Select Directory Containing filaments that define the
reference plane (exported from Imaris)')
cd(directory_name1)
vFilamentXYZ=csvread('vFilamentXYZ.txt');
Xcolv = vFilamentXYZ(:,1);
Ycolv = vFilamentXYZ(:,2);
Zcolv = vFilamentXYZ(:,3);
Const = ones(size(Xcolv));
Coefficients = [Xcolv Ycolv Const]\Zcolv; % Find the coefficients
XCoeff = Coefficients(1); % X coefficient
YCoeff = Coefficients(2); % X coefficient
CCoeff = Coefficients(3); % constant term
clear Coefficients Const Xcolv Ycolv Zcolv

% Define directory containing vFilamentXYZ, vFilamentRadius,
% vFilamentEdges, and vFilamentTypes for filaments to be split
directory_name2 = uigetdir('', 'Select Directory Containing filaments to be split (exported
```

```

from Imaris)')
cd(directory_name2)
vFilamentXYZ=csvread('vFilamentXYZ.txt');
vFilamentRadius=csvread('vFilamentRadius.txt');
vFilamentEdges=csvread('vFilamentEdges.txt');
vFilamentTypes=csvread('vFilamentTypes.txt');

mkdir(directory_name2, 'Combined')
mkdir(directory_name2, 'SEZ')
mkdir(directory_name2, 'Striatum')
csvwrite(strcat(directory_name2, '\Combined', '\vFilamentEdges.txt'), vFilamentEdges);
csvwrite(strcat(directory_name2, '\Combined', '\vFilamentTypes.txt'), vFilamentTypes);
csvwrite(strcat(directory_name2, '\Combined', '\vFilamentRadius.txt'), vFilamentRadius);
csvwrite(strcat(directory_name2, '\Combined', '\vFilamentXYZ.txt'), vFilamentXYZ);

% Calculate distance between each point and the reference plane. Formula
% for distance calculated by solving for the equation of a line that lies
% normal to the reference plane and intersects with the given point.
WallPtDist=(vFilamentXYZ(:,1).*XCoeff)+(vFilamentXYZ(:,2).*YCoeff)-(vFilamentXYZ(:,3))+
(CCoeff));
WallPtDist=(WallPtDist)./(sqrt((XCoeff^2)+(YCoeff^2)+1));
plot(WallPtDist)
mean(WallPtDist)

% Defines SEZ thickness as 20um, and determines which side of reference
% plane contains striatum

thickness=20;
halfthick=thickness/2;
if mean(WallPtDist)<0
    SEZPts=WallPtDist>(-1*halfthick);
else
    SEZPts=WallPtDist<(halfthick);
end

% Split filaments. If any points in a segment belong to the striatum, then
% the entire segment is classified as striatum.
edgetest=ismember(vFilamentEdges, find(~SEZPts));
edgetest2=edgetest(:,1)+edgetest(:,2);
StrEdges=vFilamentEdges((find(edgetest2)), :);
SEZEdges=vFilamentEdges((find(edgetest2==0)), :);
vFilamentIndex=cumsum((vFilamentXYZ(:,1).*0)+1);
SEZXYZ=vFilamentXYZ((find(ismember(vFilamentIndex, SEZEdges))), :);
SEZTypes=vFilamentTypes((find(ismember(vFilamentIndex, SEZEdges))), :);
SEZRadius=vFilamentRadius((find(ismember(vFilamentIndex, SEZEdges))), :);
StrXYZ=vFilamentXYZ((find(ismember(vFilamentIndex, StrEdges))), :);
StrTypes=vFilamentTypes((find(ismember(vFilamentIndex, StrEdges))), :);
StrRadius=vFilamentRadius((find(ismember(vFilamentIndex, StrEdges))), :);
SEZIndAdjust=vFilamentIndex-(cumsum(~ismember(vFilamentIndex, SEZEdges)));
StrIndAdjust=vFilamentIndex-(cumsum(~ismember(vFilamentIndex, StrEdges)));
testsize=size(vFilamentIndex);
indmax=testsize(1);

```

```
for i=1:indmax
    SEZEdges(find(SEZEdges==i))=SEZIndAdjust(i);
end
for i=1:indmax
    StrEdges(find(StrEdges==i))=StrIndAdjust(i);
end

% Save the SEZ only filaments

csvwrite(strcat(directory_name2, '\SEZ', '\vFilamentEdges.txt'), SEZEdges);
csvwrite(strcat(directory_name2, '\SEZ', '\vFilamentTypes.txt'), SEZTypes);
csvwrite(strcat(directory_name2, '\SEZ', '\vFilamentRadius.txt'), SEZRadius);
csvwrite(strcat(directory_name2, '\SEZ', '\vFilamentXYZ.txt'), SEZXYZ);

% Save the Striatum only filaments

csvwrite(strcat(directory_name2, '\Striatum', '\vFilamentEdges.txt'), StrEdges);
csvwrite(strcat(directory_name2, '\Striatum', '\vFilamentTypes.txt'), StrTypes);
csvwrite(strcat(directory_name2, '\Striatum', '\vFilamentRadius.txt'), StrRadius);
csvwrite(strcat(directory_name2, '\Striatum', '\vFilamentXYZ.txt'), StrXYZ);

output='Finished Splitting Filaments';
```
