# Supplementary material for: A Specialized Microvascular Domain in the Mouse Neural Stem Cell Niche
Source: PubMed Central journal article supplement (PMC3538546; doi:10.1371/journal.pone.0053546), 2013-01-07
Supplement: pone.0053546.s006.pdf [file pone.0053546.s006.pdf]

```
function calctracks

% calctracks.m
%
% Copyright 2010-2012,
% Baylor College of Medicine
% All Rights Reserved
%
% Last modified 7/8/2012
%
% Takes filament coordinates exported by Imaris 7.4.2 (Bitplane), and
% defines vessel tracks that connect branch points to branch points,
% branch points to end points, or end points to end points. Filament
% coordinates can be exported using ImarisXT.
%
% Each of the exported vessel tracks defines a vessel unit that is needed
% later by "calctortuosity.m" for calculating tortuosity, or by
% "vesselrender.m" for plotting vessels, calculating vessel angles w.r.t.
% a reference plane, or calculating density w.r.t. a reference plane.
%
% Inputs:
% -Directory containing vessel coordinates
%
% Output:
% "tracks.txt" - csv formatted file containing a matrix that lists each
% track by column. For track k, the first point of the track is listed
% at Row 1, Col k, the second point is listed at Row 2, Col k, and so
% on, until a 0 is reached. Each point i listed in this matrix
% corresponds to the ith row of vFilamentXYZ, which contains the x/y/z
% coordinates of the point.
%

% Read vFilamentEdges from desired directory

directory_name = uigetdir('', 'Select directory containing filament coordinates (exported
from Imaris)');
cd(directory_name)
a=csvread('vFilamentXYZ.txt');
c=csvread('vFilamentEdges.txt');
sizea=size(a);
upp=sizea(1);
c2=c;

% Construct the matrix d2:
% -The ith row of d2 corresponds to the ith point defined in vFilamentXYZ.
% -Row i, Col 1 corresponds to how many segments the ith point is part of
% -Row i, Col 2 serves as a counter of how many segments containing the ith
% point remain. The value of Row i, Col 2 therefore starts off equal to
% Row i, Col 1; but, as each of the segments is counted, this value will
% reduce by 1 until eventually it reaches 0.
% -Row i, Col 3 equals 0 if the ith point is not a branch or end point
```

```

% (i.e. it belongs to exactly two segments), and equals 1 otherwise.
% -Row i, Col 4:m lists all the points that the ith point is connected to.
% Zeros are used as placeholders so that the same number of columns are
% used in each row.
% -Row i, Col m+j for j>1 serves as a marker as a counter of whether the
% segment containing the ith point and the point located at Row i, Col 3+j
% has already been counted. This value starts off equal to 1, but is
% reduced to 0 after the segment is counted.
for i=1:upp
    [row col]=find(c2==i);
    tester=size(row);
    numtester=tester(1);
    d2(i,1)=numtester;
    for j=1:numtester
        d2(i,3+j)=c2(row(j),3-col(j));
    end
end
d2(:,2)=d2(:,1);
d2(:,3)=(d2(:,1)~=2);
width=max(d2(:,1));
d2(:,(4+width):(3+(2*width)))=(d2(:,4:(3+width))>0);

% Initialize looping parameters
looptest=1;
ptnum=0;
tracknum=1;

while looptest
    % Find branch or end point "currpt" that still belongs to an un-counted
    % segment
    [row col]=find((d2(:,2)).*(d2(:,3)));
    looptest2=1;
    currpt=row(1);
    % Reduce the counter at d2 Row currpt, Col 2 by 1.
    d2(currpt,2)=(d2(currpt,2)-1);
    % Start a new track with point "currpt" as the first point
    tracks(ptnum+1,tracknum)=currpt;
    ptnum=ptnum+1;
    while looptest2
        % Let prevpt = currpt from the last iteration
        prevpt=currpt;
        % Find an uncounted segment containing point "prevpt"
        [row col]=find(d2(prevpt,(4+width):(3+(2*width)))));
        % Make this point the new currpt, and mark the points of this
        % segment as counted in both places (i.e. Rows "prevpt" and
        % "currpt")
        d2(prevpt,3+width+col(1))=0;
        currpt=d2(prevpt,3+col(1));
        [row col]=find(d2(currpt,(4:3+width))==prevpt);
        d2(currpt,3+width+col(1))=0;
        d2(currpt,2)=(d2(currpt,2)-1);
        % Add this new point to the current track and iterate ptnum
    end
end

```

```
    tracks(ptnum+1,tracknum)=currpt;
    ptnum=ptnum+1;
    % Only continue this track if currpt is not a branch or end point
    looptest2=d2(currpt,1)==2;
end
% Only continue making tracks if there are still uncounted segments
looptest=((sum((d2(:,2)).*(d2(:,3))))>0);
% Reset ptnum, iterate tracknum
ptnum=0;
tracknum=tracknum+1;
end

% Eliminate tracks containing only two points
trklength=sum(tracks>0);
[row col]=find(trklength>2);
tracks=tracks(:,col);

% Split tracks that form closed loops into two
trklength=sum(tracks>0);
dummy=size(tracks);
numtracks=dummy(2);
addedtrks=tracks(:,1).*0;
newtracks=0;

for i=1:numtracks
    firstpt=tracks(1,i);
    lastpt=tracks(trklength(i),i);
    if firstpt==lastpt
        midi=floor(trklength(i)/2);
        addedtrks(1:(trklength(i)-midi),newtracks+1)=tracks((midi+1):trklength(i),i);
        newtracks=newtracks+1;
        tracks((midi+1):trklength(i),i)=(tracks((midi+1):trklength(i),i)).*0;
    end
end

if newtracks>0
    tracks(:,numtracks+1:numtracks+newtracks)=addedtrks;
end

trklength=sum(tracks>0);
maxlength=max(trklength);
tracks=tracks(1:maxlength,:);

% Write to file the listing of the tracks
csvwrite('tracks.txt',tracks);

end
```
