# Supplementary material for: A Specialized Microvascular Domain in the Mouse Neural Stem Cell Niche
Source: PubMed Central journal article supplement (PMC3538546; doi:10.1371/journal.pone.0053546), 2013-01-07
Supplement: pone.0053546.s007.pdf [file pone.0053546.s007.pdf]

```
function calctortuosity

% calctortuosity.m
%
% Copyright 2010-2012,
% Baylor College of Medicine
% All Rights Reserved
%
% Last modified 7/9/2012
%
% Takes filament coordinates exported by Imaris 7.4.2 (Bitplane) and the
% tracks calculated by "calctracks.m", and calculates vessel tortuosity for
% each track. Filament coordinates can be exported using ImarisXT.
%
% Inputs:
% -Directory containing vessel coordinates and tracks
% -Directory containing filament coordinates that define reference plane
% or alternatively the equation of a plane. Used for rotation of data
% and plotting of the plane.
%
% Output:
% "arclength.txt" - csv formatted file listing the arclength for each
% track
% "displac.txt" - csv formatted file listing the total displacement for
% each track
% "tort.txt" - csv formatted file listing the tortuosity for each
% track
% "zcom.txt" - csv formatted file listing the z-center of mass for each
% track. This is in rotated coordinates, where z represents
% distance from the reference plane.
%

% Read vFilamentXYZ and tracks from desired directory

directory_name = uigetdir('','Select directory containing filament coordinates (exported
from Imaris)')
cd(directory_name)
a=csvread('vFilamentXYZ.txt');
tracks=csvread('tracks.txt');

% Decide how to define reference plane
button3 = questdlg('Define equation of the plane manually, or by finding plane of best
fit from saved filament coordinates?','','Manual','Plane of Best Fit','Manual');
if button3
    fitplanetest=button3(1)=='P';
end
% If defining the plane using the plane of best fit through saved filament
% coordinates, loads filament coordinates from given directory
if fitplanetest
    directory_name = uigetdir('','Select directory containing the filaments that
define the reference plane (exported from Imaris)')
```

```

vFilamentXYZ=csvread(strcat(directory_name, '\vFilamentXYZ.txt'));
Xcolv = vFilamentXYZ(:,1);
Ycolv = vFilamentXYZ(:,2);
Zcolv = vFilamentXYZ(:,3);
Const = ones(size(Xcolv));
% Use regression to determine plane of best fit
Coefficients = [Xcolv Ycolv Const]\Zcolv;
XCoeff = Coefficients(1);
YCoeff = Coefficients(2);
CCoeff = Coefficients(3);
else
% If defining the plane manually, queries the coefficients. Default is
% a=b=c=0
prompt2 = {'Z = aX + bY + c';
a = ', 'b = ', 'c = '};
dlg_title2 = 'Define plane coefficients';
num_lines2 = 1;
def2 = {'0', '0', '0'};
answer2 = inputdlg(prompt,dlg_title,num_lines,def);
if ~isempty(answer2)
    XCoeff = str2num(cell2mat(answer2(1)));
    YCoeff = str2num(cell2mat(answer2(2)));
    CCoeff = str2num(cell2mat(answer2(3)));
end
end

vFilamentXYZ=a;

% Now, rotate the data with respect to the reference plane...
% We start by defining the normal vector to the plane.
vector=[-XCoeff -YCoeff 1];
arclength=sqrt(dot(vector,vector));

% Next, we determine what angle this vector must be rotated by in order for
% it to lie in the x-y plane. After determining this angle (-phi), we
% rotate the vector by -phi around the x-axis by multiplying by the
% appropriate rotation matrix.
phi=atan2(vector(1,3),vector(1,2));
vector2=[1,0,0;0,cos(-phi),(-sin(-phi));0,sin(-phi),cos(-phi)]*vector';
vector2=vector2';

% Then, we determine what angle this transformed vector must be rotated by
% in order for it to lie parallel with the x-axis. After determining this
% angle (-theta), we are ready to rotate the coordinates of the vessels.
theta=atan2(vector2(1,2),vector2(1,1));

% Now, we rotate the coordinates of the vessels. We start by rotating
% around the x-axis by -phi.
vFilamentXYZ=[1,0,0;0,cos(-phi),(-sin(-phi));0,sin(-phi),cos(-phi)]*vFilamentXYZ';

% Next, we rotate around the z-axis by -theta.
vFilamentXYZ=[cos(-theta),(-sin(-theta)),0;sin(-theta),cos(-theta),0;0,0,1]*vFilamentXYZ';

```

```
% Finally, we rotate around the y-axis by -90 degrees. This is required so
% that the vector normal to the plane is parallel with the z-axis instead
% of the x-axis. This is a special case of the corresponding rotation
% matrix.
vFilamentXYZ=vFilamentXYZ';
xb=vFilamentXYZ(:,1);
yb=vFilamentXYZ(:,2);
zb=vFilamentXYZ(:,3);
vFilamentXYZ(:,3)=xb;
vFilamentXYZ(:,1)=-zb;

% To zero our transformed coordinates such that the reference plane is
% located at z=0, we determine at what z-location the plane sits after the
% rotations above. Because z is constant after the rotations, all we need
% to do is calculate z for any point on the plane. We do this with the
% point (x,y,z)=(0,0,c).
PlaneCoord=CCoeff*sin(phi)*sin(theta);

% Then, we subtract the z-values of our rotated data set by this constant.
vFilamentXYZ(:,3)=vFilamentXYZ(:,3)-PlaneCoord;

% Now we use tracks to calculate tortuosity for each vessel segment. We
% also save the distance between the reference plane and the center of mass
% of this segment

a=vFilamentXYZ;
a2=a;

clear arclength

% Determine the number of tracks, and the length of each track
trklength=sum(tracks>0);
testsize=size(trklength);
tracknum=testsize(2);

% Initialize arrays
arclength=trklength.*0;
displac=arclength;
tort=arclength;
zcom=arclength;

for i=1:tracknum
    ds=0;
    % Start a running sum of the z-coordinates
    zcom(1,i)=zcom(1,i)+a2(tracks(1,i),3);
    for j=1:(trklength(1,i)-1)
        % Determine the endpoints of the current segment
        x2=a2(tracks(j+1,i),1);
        y2=a2(tracks(j+1,i),2);
        z2=a2(tracks(j+1,i),3);
        x1=a2(tracks(j,i),1);
```

```
    y1=a2(tracks(j,i),2);
    z1=a2(tracks(j,i),3);
    % Determine the length of the current segment
    dx=x2-x1;
    dy=y2-y1;
    dz=z2-z1;
    ds0=sqrt((dx^2)+(dy^2)+(dz^2));
    % Add this to a running total of arclength
    ds=ds+ds0;
    % Continue the running sum of the z-coordinate
    zcom(1,i)=zcom(1,i)+z2;
end
% Store arclength for this track
arclength(1,i)=ds;
% Divide z-coord running sum by # of points to get z-center of mass.
zcom(1,i)=zcom(1,i)/(trklength(1,i)-1);
% Determine the first and last points of the entire track
x2=a2(tracks(trklength(1,i),i),1);
y2=a2(tracks(trklength(1,i),i),2);
z2=a2(tracks(trklength(1,i),i),3);
x1=a2(tracks(1,i),1);
y1=a2(tracks(1,i),2);
z1=a2(tracks(1,i),3);
% Determine the total displacement between these two points
dx=x2-x1;
dy=y2-y1;
dz=z2-z1;
dsdisp=sqrt((dx^2)+(dy^2)+(dz^2));
% Store total displacement for this track
displac(1,i)=dsdisp;
% Calculate and store tortuosity for this track (arclength/displacemt)
tort(1,i)=arclength(1,i)/displac(1,i);
end

% Save calculated parameters to file
csvwrite('arclength.txt',arclength);
csvwrite('displac.txt',displac);
csvwrite('tort.txt',tort);
csvwrite('zcom.txt',zcom);

AvgTortuosity=mean(tort)

end
```
