# Supplementary material for: A Specialized Microvascular Domain in the Mouse Neural Stem Cell Niche
Source: PubMed Central journal article supplement (PMC3538546; doi:10.1371/journal.pone.0053546), 2013-01-07
Supplement: pone.0053546.s008.pdf [file pone.0053546.s008.pdf]

```
function output = vesselrender

% vesselrender.m
%
% Copyright 2010-2012,
% Baylor College of Medicine
% All Rights Reserved
%
% Last modified 7/8/2012
%
% Renders a vessel network in MATLAB R2008a (MathWorks) using exported
% filament coordinates from Imaris 7.4.2 (Bitplane) and the
% tracks calculated by "calctracks.m". Filament coordinates can be
% exported using ImarisXT.
%
% Program can run in three modes (selected using dialog box):
% A) Plot Vessels - Plots a 3D vessel network in MATLAB
%           Also gives the option to plot a reference plane
%
%   Inputs:
%   -Directory containing vessel coordinates
%   -Directory containing filament coordinates that define reference plane
%     or alternatively the equation of a plane. Used for rotation of data
%     and plotting of the plane. Only needed if plotting plane.
%
%   Outputs:
%   -3D plot of vessels and plane
%
% B) Analyze Density - Calculates vessel density as a function of
%           perpendicular distance from a reference plane
%
%   Inputs:
%   -Directory containing vessel coordinates
%   -Directory containing filament coordinates that define reference plane
%     or alternatively the equation of a plane
%   -Directory for saving output files
%   -xmin/xmax/ymin/ymax/zmin/zmax for the volume to be analyzed
%   -Sampling frequency (axial distance between adjacent cross-sections)
%
%   Outputs:
%   "FigXXX.fig" - MATLAB figures displaying cross-sectional planes
%     through the plotted 3D volume
%   "VesselArea.txt" - csv formatted file containing vessel cross-
%     sectional areas as a function of distance from reference plane
%   "TotalArea.txt" - csv formatted file containing cross-sectional areas
%     of total volume as a function of distance from reference plane
%   "AllAreaData.txt" - csv formatted file containing cross-sectional
%     areas of the vessels and total volume, as well as their ratio,
%     as a function of distance from reference plane
%   "DensityProfile.fig" - MATLAB figure plotting the vessel volume
%     density as a function of distance from reference plane
%
% C) Analyze Angle - Calculates angle between vessel tracks and a reference
%           plane
```

```
% Inputs:
% -Directory containing vessel coordinates
% -Directory containing filament coordinates that define reference plane
% or alternatively the equation of a plane
% -Directory for saving output files
%
% Outputs:
% "AngleProfile.fig" - MATLAB figure displaying a scatterplot of
% angles from reference plane as a function of distance from plane
% "AngleData.txt" - csv formatted file containing angles from reference
% plane as a function of distance from plane
% "CumAngle.fig" - MATLAB figure displaying the cumulative probability
% distribution of measured angles
% "CumAngle.txt" - csv formatted file containing the cumulative
% probability distribution of measured angles
%
%%%%%%%%%%%%%%%%%%%%%%%%%%%%%%%%%%%%%%%%%%%%%%%%%%%%%%%%%%%%%%%%%%%%%%%%
% Part 1 - Select run-mode and define reference plane
%
% Start by setting the defaults
modetest=0;
analysismode=0;
planetest=1;
fitplanetest=0;

% Determine whether to plot vessels, analyze density, or analyze planarity.
% Default is to plot vessels.
button = questdlg('What do you want to do with vessel coordinates?','Select Mode','Plot Vessels',
'Analyze Density','Analyze Planarity','Plot Vessels');
if button
    modetest=button(1)=='A';
end
if modetest
    analysismode=button(9)=='P';
else
% If plotting vessels, decide whether to plot reference plane. Default is yes.
    button2 = questdlg('Plot reference plane?','','Yes','No','Yes');
    if button2
        planetest=button2(1)=='Y';
    end
end

% Define equation for reference plane. Reference plane is defined, even if
% not being plotted, because it is necessary for rotation of the volume,
% and potentially for analysis of density as a distance from the plane, or
% for determination for path angle with respect to the plane. Coefficients
% are for the following equation of the plane:  $Z = aX + bY + c$ 
% The vector orthogonal to the plane must have a non-zero z-component.

% Set default plane to be  $Z = 0$ . When using this default, the data set will
```

```
% not be rotated at all.

XCoeff = 0; % a = X coefficient
YCoeff = 0; % b = Y coefficient
CCoeff = 0; % c = constant term

% If plotting the plane, analyzing density, or analyzing angle, discards
% default plane and loads user-defined plane.

if planetest
% Determines whether to define plane manually, or by finding plane of
% best-fit through saved filament coordinates. Default is manual.
    button3 = questdlg('Define equation of the plane manually, or by finding plane of best
fit from saved filament coordinates?', 'Manual', 'Plane of Best Fit', 'Manual');
    if button3
        fitplanetest=button3(1)=='P';
    end
% If defining the plane using the plane of best fit through saved filament
% coordinates, loads filament coordinates from given directory
    if fitplanetest
        directory_name = uigetdir('','Select directory containing the filaments that
define the reference plane (exported from Imaris)');
        vFilamentXYZ=csvread(strcat(directory_name, '\vFilamentXYZ.txt'));
        Xcolv = vFilamentXYZ(:,1);
        Ycolv = vFilamentXYZ(:,2);
        Zcolv = vFilamentXYZ(:,3);
        Const = ones(size(Xcolv));
% Use regression to determine plane of best fit
        Coefficients = [Xcolv Ycolv Const]\Zcolv;
        XCoeff = Coefficients(1);
        YCoeff = Coefficients(2);
        CCoeff = Coefficients(3);
    else
% If defining the plane manually, queries the coefficients. Default is
% a=b=c=0
        prompt2 = {'Z = aX + bY + c
a = ', 'b = ', 'c = '};
        dlg_title2 = 'Define plane coefficients';
        num_lines2 = 1;
        def2 = {'0', '0', '0'};
        answer2 = inputdlg(prompt,dlg_title,num_lines,def);
        if ~isempty(answer2)
            XCoeff = str2num(cell2mat(answer2(1)));
            YCoeff = str2num(cell2mat(answer2(2)));
            CCoeff = str2num(cell2mat(answer2(3)));
        end
    end
end

end

% Gets directory containing the coordinates of the vessel network. This
% information should be exported using ImarisXT and should include
```

```
% vFilamentXYZ.txt, tracks.txt, and vFilamentRadius.txt
directory_name2 = uigetdir('', 'Select directory containing the filaments that define the vessels (exported from Imaris)');

vFilamentXYZ=csvread(strcat(directory_name2, '\vFilamentXYZ.txt'));
tracks=csvread(strcat(directory_name2, '\tracks.txt'));
vFilamentRadius=csvread(strcat(directory_name2, '\vFilamentRadius.txt'));

% Guesses the x-, y-, and z- limits for the volume that is loaded. This is
% important for determining vessel density with respect to reference plane,
% because after rotation, the total area of each slice will not be equal at
% different distances from the reference plane. Also sets the default slice
% interval to be 1 um.
xmax=max(vFilamentXYZ(:,1));
xmin=min(vFilamentXYZ(:,1));
ymax=max(vFilamentXYZ(:,2));
ymin=min(vFilamentXYZ(:,2));
zmax=max(vFilamentXYZ(:,3));
zmin=min(vFilamentXYZ(:,3));
sliceint=1;

if modetest
% Sets the directory for saving files - only used when analyzing density or angle
    savedir = uigetdir('', 'Select directory where files will be saved');
    if savedir==0
        'Error - Must select directory where files will be saved'
        return
    end
% Queries the x-, y-, and z- limits for the volume that is loaded. The
% default values will only be close if the entire volume is filled with
% vessels, so use them with care. Sampling interval is also important - a
% smaller value will improve resolution, but requires more memory and
% runtime.
% This step is only necessary if in density analysis mode.
    if ~analysismode
        prompt = {'Xmin (um)', 'Xmax (um)', 'Ymin (um)', 'Ymax (um)', 'Zmin (um)', 'Zmax
(um)', 'Sampling Interval (um)'};
        dlg_title = 'Data Limits';
        num_lines = 1;
        def = {'0', num2str(xmax), '0', num2str(ymax), '0', num2str(zmax), '1'};
        answer = inputdlg(prompt, dlg_title, num_lines, def);
        if ~isempty(answer)
            xmin=str2num(cell2mat(answer(1)));
            xmax=str2num(cell2mat(answer(2)));
            ymin=str2num(cell2mat(answer(3)));
            ymax=str2num(cell2mat(answer(4)));
            zmin=str2num(cell2mat(answer(5)));
            zmax=str2num(cell2mat(answer(6)));
            sliceint=str2num(cell2mat(answer(7)));
        end
    end
end
```

```
%%%%%%%%%%%%%%%%%%%%%%%%%%%%%%%%%%%%%%%%%%%%%%%%%%%%%%%%%%%%%%%%%%%%%%%%
% Part 2 - Rotate and translate entire data set so that the reference plane
% is parallel with the plane Z = 0. This transforms the z-coordinates so
% that z= perpendicular distance from the reference plane.
%
% To do this, we must first determine what rotations are necessary to
% rotate the normal vector to the reference plane so that it transforms to
% [0 0 1]. Then we must rotate all of the vessel coordinates by these same
% angles. Because 3D rotations are NOT commutative, order is important
% here. Finally, the rotated coordinates must be shifted in z so that the
% transformed reference plane is located at z=0.
%

% We start by defining the normal vector to the plane.
vector=[-XCoeff -YCoeff 1];
arclength=sqrt(dot(vector,vector));

% Next, we determine what angle this vector must be rotated by in order for
% it to lie in the x-y plane. After determining this angle (-phi), we
% rotate the vector by -phi around the x-axis by multiplying by the
% appropriate rotation matrix.
phi=atan2(vector(1,3),vector(1,2));
vector2=[1,0,0;0,cos(-phi),(-sin(-phi));0,sin(-phi),cos(-phi)]*vector';
vector2=vector2';

% Then, we determine what angle this transformed vector must be rotated by
% in order for it to lie parallel with the x-axis. After determining this
% angle (-theta), we are ready to rotate the coordinates of the vessels.
theta=atan2(vector2(1,2),vector2(1,1));

% Now, we rotate the coordinates of the vessels. We start by rotating
% around the x-axis by -phi.
vFilamentXYZ=[1,0,0;0,cos(-phi),(-sin(-phi));0,sin(-phi),cos(-phi)]*vFilamentXYZ';

% Next, we rotate around the z-axis by -theta.
vFilamentXYZ=[cos(-theta),(-sin(-theta)),0;sin(-theta),cos(-theta),0;0,0,1]*vFilamentXYZ;

% Finally, we rotate around the y-axis by -90 degrees. This is required so
% that the vector normal to the plane is parallel with the z-axis instead
% of the x-axis. This is a special case of the corresponding rotation
% matrix.
vFilamentXYZ=vFilamentXYZ';
xb=vFilamentXYZ(:,1);
yb=vFilamentXYZ(:,2);
zb=vFilamentXYZ(:,3);
vFilamentXYZ(:,3)=xb;
vFilamentXYZ(:,1)=-zb;

% To zero our transformed coordinates such that the reference plane is
% located at z=0, we determine at what z-location the plane sits after the
% rotations above. Because z is constant after the rotations, all we need
```

```

% to do is calculate z for any point on the plane. We do this with the
% point (x,y,z)=(0,0,c).
PlaneCoord=CCoeff*sin(phi)*sin(theta);

% Then, we subtract the z-values of our rotated data set by this constant.
vFilamentXYZ(:,3)=vFilamentXYZ(:,3)-PlaneCoord;

% In order to calculate density with respect to the distance from the
% reference plane, a surface that bounds the volume must be defined, and
% then these same transformations must be applied.
%
% The surface is defined by the vertices of the rectangular prism bounding
% the data set, and by the centroids of the upper and lower faces of this
% rectangular prism. These faces are required in order to close the
% surface, so that contours can be drawn.
x=[xmin xmax xmax xmin];
y=[ymin ymin ymax ymax];
x=[x;x];
y=[y;y];
z=[zmin zmin zmin zmin;ymax ymax ymax ymax];
z=[z(1,:);z(2,:)];
xdel=(xmin+((xmax-xmin)/2));
ydel=(ymin+((ymax-ymin)/2));
x=[xdel xdel xdel xdel;x;xdel xdel xdel xdel];
y=[ydel ydel ydel ydel;y;ydel ydel ydel ydel];
x(:,5)=x(:,1);
y(:,5)=y(:,1);
z(:,5)=z(:,1);

coord1=[x(1,:);y(1,:);z(1,:)];
coord2=[x(2,:);y(2,:);z(2,:)];
coord3=[x(3,:);y(3,:);z(3,:)];
coord4=[x(4,:);y(4,:);z(4,:)];

% Then, the same transformations are applied to the coordinates defining
% this surface.
coord1t=[1,0,0;0,cos(-phi),(-sin(-phi));0,sin(-phi),cos(-phi)]*coord1;
coord2t=[1,0,0;0,cos(-phi),(-sin(-phi));0,sin(-phi),cos(-phi)]*coord2;
coord3t=[1,0,0;0,cos(-phi),(-sin(-phi));0,sin(-phi),cos(-phi)]*coord3;
coord4t=[1,0,0;0,cos(-phi),(-sin(-phi));0,sin(-phi),cos(-phi)]*coord4;
coord1tt=[cos(-theta),(-sin(-theta)),0;sin(-theta),cos(-theta),0;0,0,1]*coord1t;
coord2tt=[cos(-theta),(-sin(-theta)),0;sin(-theta),cos(-theta),0;0,0,1]*coord2t;
coord3tt=[cos(-theta),(-sin(-theta)),0;sin(-theta),cos(-theta),0;0,0,1]*coord3t;
coord4tt=[cos(-theta),(-sin(-theta)),0;sin(-theta),cos(-theta),0;0,0,1]*coord4t;

xdiamond=[coord1tt(1,:);coord2tt(1,:);coord3tt(1,:);coord4tt(1,:)];
ydiamond=[coord1tt(2,:);coord2tt(2,:);coord3tt(2,:);coord4tt(2,:)];
zdiamond=[coord1tt(3,:);coord2tt(3,:);coord3tt(3,:);coord4tt(3,:)];

xdiamondb=xdiamond;
ydiamondb=ydiamond;
zdiamondb=zdiamond;

```

```
zdiamond=xdiamondb;
xdiamond=-zdiamondb;

zdiamond=zdiamond-PlaneCoord;

% Finally, determine the x-, y-, and z-limits, and use this and the slice
% interval to determine the number of slices required
xmax=max(max(xdiamond));
xmin=min(min(xdiamond));
ymax=max(max(ydiamond));
ymin=min(min(ydiamond));
zmax=max(max(zdiamond));
zmin=min(min(zdiamond));

zdelta=zmax-zmin;

numslices=floor(zdelta/sliceint);

v=zeros(1,numslices);

for i=1:numslices
    v(1,i)=i;
end

v=v-1;
v=v.*sliceint*(-1);
v=v+zmax;
v=rot90(v);

%%%%%%%%%%%%%%%%%%%%%%%%%%%%%%%%%%%%%%%%%%%%%%%%%%%%%%%%%%%%%%%%%%%%%%%%
% Part 3 - Plot the entire vessel network, and use it to either display the
% vessel network, analyze the density, or analyze the angle (as selected in
% Part 1 above).

% Use the list of tracks to determine how many tracks there are, and how
% many points in each track.
trklength=sum(tracks>0);
testsize=size(trklength);
tracknum=testsize(2);

% Open a figure, and set defaults.
figure;
[x y z]=cylinder([1 2]);
xold=x(1,:).*0;
yold=xold;
zold=xold;
if analysismode
    planarity=[];
end

% Draw each track segment by segment. i=track number, and j=point number
% within the current track
```

```

for i=1:tracknum
    for j=1:(trklength(1,i)-1)
% Determine the location of points j and j+1 along this track, as well as
% the radius of the filament at each of these points. Define a vector using
% these two points.
        xyz2=[vFilamentXYZ(tracks(j+1,i),1),vFilamentXYZ(tracks(j+1,i),2),vFilamentXYZ
(tracks(j+1,i),3)];
        xyz1=[vFilamentXYZ(tracks(j,i),1),vFilamentXYZ(tracks(j,i),2),vFilamentXYZ(tracks
(j,i),3)];
        r2=vFilamentRadius(tracks(j+1,i),1);
        r1=vFilamentRadius(tracks(j,i),1);
        vector=xyz2-xyz1;
        arclength=norm(vector);
% If run-mode is for determining angle, use the dot product of this vector
% with the dot product of the vector normal to the reference plane [0 0 1]
% to determine the angle. Add this to the list and go to the next track
% point.
        if analysismode
            wallangle=((acos(vector(1,3)/arclength))*180/pi)-90;
            planarity=[planarity;((xyz1(1,3)+xyz2(1,3))/2),abs(wallangle)];
            continue
        end

% To plot each vessel segment, we will use the MATLAB cylinder function,
% which plots a cylinder with an axis of (x,y,z) = (0,0,0) to (0,0,1), and
% a user-defined radius at each end of the axis. This cylinder then needs
% to be rotated +90 degrees around the y-axis, and then rotated again by an
% angle of theta around the z-axis, and then one last time by an angle of
% phi around the x-axis. Finally, it will have to be translated from the
% origin to the appropriate location in 3-space.
%
% To determine phi and theta, we perform the inverse by determining what
% angle the vector of the segment must be rotated by in order to move it to
% the x-y plane, and then from there to be parallel with the x-axis.
% Remember that 3D rotation is not commutative, so these rotations must be
% done in reverse when moving the cylinder from the z-axis to its
% appropriate angle and location with respect to the origin.
        phi=atan2(vector(1,3),vector(1,2));
        vector2=[1,0,0;0,cos(-phi),(-sin(-phi));0,sin(-phi),cos(-phi)]*vector';
        vector2=vector2';
        theta=atan2(vector2(1,2),vector2(1,1));

% Here, we use the cylinder function to determine the coordinates of our
% cylinder with the appropriate length and radii, albeit at the wrong angle
% and location.
        [x y z]=cylinder([r1 r2]);
        z(2,:)=arclength;

% If this is not the first segment in this track, then it must be axially
% rotated so that it will be axially aligned with the previous segment.
% Otherwise, the internal volume of the cylindrical segment will be
% artificially reduced because the walls will be twisted together.

```



```

% For example, from ----- to ---- ----
%                               \ /
%                               / \
%                               -----
%
% Determine the angle psi that the new cylinder must be axially rotated by,
% and then perform the rotation.
    if j>1
        testvec=[(xold(1,1)-xyz1(1,1)), (yold(1,1)-xyz1(1,2)), (zold(1,1)-xyz1(1,3))];
        testvecA=[1,0,0;0,cos(-phi), (-sin(-phi));0,sin(-phi),cos(-phi)]*testvec';
        testvecB=[cos(-theta), (-sin(-theta)),0;sin(-theta),cos(-theta),0;0,0,1] *
*testvecA;
        testvecC=[-testvecB(3,1);testvecB(2,1);testvecB(1,1)];
        psi=atan2(testvecC(2,1),testvecC(1,1));
        coord1=[x(1,:);y(1,:);z(1,:)];
        coord2=[x(2,:);y(2,:);z(2,:)];
        coord1tt=[cos(psi), (-sin(psi)),0;sin(psi),cos(psi),0;0,0,1]*coord1;
        coord2tt=[cos(psi), (-sin(psi)),0;sin(psi),cos(psi),0;0,0,1]*coord2;
        xtt=[coord1tt(1,:);coord2tt(1,:)];
        ytt=[coord1tt(2,:);coord2tt(2,:)];
        ztt=[coord1tt(3,:);coord2tt(3,:)];
        x=xtt;y=ytt;z=ztt;
    end

% Now, we use the angles we determined above to transform the coordinates
% of our cylinder so that it is rotated at the appropriate angle.
%
% We start by rotating by +90 degrees around the y-axis.
    xb=x;
    yb=y;
    zb=z;
    z=-xb;
    x=zb;
    coord1=[x(1,:);y(1,:);z(1,:)];
    coord2=[x(2,:);y(2,:);z(2,:)];
% Next, we rotate by theta around the z-axis
    coord1t=[cos(theta), (-sin(theta)),0;sin(theta),cos(theta),0;0,0,1]*coord1;
    coord2t=[cos(theta), (-sin(theta)),0;sin(theta),cos(theta),0;0,0,1]*coord2;
% Then, we rotate by phi around the x-axis
    coord1tt=[1,0,0;0,cos(phi), (-sin(phi));0,sin(phi),cos(phi)]*coord1t;
    coord2tt=[1,0,0;0,cos(phi), (-sin(phi));0,sin(phi),cos(phi)]*coord2t;
    xtt=[coord1tt(1,:);coord2tt(1,:)];
    ytt=[coord1tt(2,:);coord2tt(2,:)];
    ztt=[coord1tt(3,:);coord2tt(3,:)];
% Finally, we translate the cylinder so that it is located at the right
% location in 3-space.
    xfinal=xtt+xyz1(1,1);
    yfinal=ytt+xyz1(1,2);
    zfinal=ztt+xyz1(1,3);
% If this is the second (or later) segment within this track, we must
% replace the coordinates of the beginning edge of the cylinder with the
% coordinates used previously for the ending edge of the cylinder. This

```

```
% ensures continuity of vessel filament from segment to segment, with no
% gap in between segments.
    if j>1
        xfinal(1,:)=xold;
        yfinal(1,:)=yold;
        zfinal(1,:)=zold;
    end

% The coordinates for both faces of the cylinder must be added to the list
% of cylinder coordinates. This ensures a closed surface, and makes sure that
% contours can be drawn.
    xfinal=[((xfinal(1,).*0)+xyz1(1,1));xfinal;((xfinal(1,).*0)+xyz2(1,1))];
    yfinal=[((yfinal(1,).*0)+xyz1(1,2));yfinal;((yfinal(1,).*0)+xyz2(1,2))];
    zfinal=[((zfinal(1,).*0)+xyz1(1,3));zfinal;((zfinal(1,).*0)+xyz2(1,3))];
% The coordinates for the ending edge of the cylinder are saved, so that
% they can be used as the beginning coordinates of the cylinder in the next
% iteration.
    xold=xfinal(3,:);
    yold=yfinal(3,:);
    zold=zfinal(3,:);

% If run-mode is for displaying a plot of the vessels, use the surf
% function to draw this filament segment, and then go on to the next segment.
    if ~modetest
        surf(xfinal,yfinal,zfinal,'FaceColor',[1 0 0],'EdgeColor',[0 0 0]);
        hold on
        continue
    end

% Otherwise, run-mode must be set for analyzing density. Use the contour3
% mode instead in order to draw contours, which can be used for determining
% cross-sectional area of the vessel network at each z-plane of interest,
% as was defined above.
    [c h]=contour3(xfinal,yfinal,zfinal,v,'k');
    hold on

% Each of these contours is saved as a graphics object with handle h. For
% each of these unique handles, save tags marking these contours as
% belonging to a vessel, and with tags that note the z-coordinate where the
% contour was taken. These tags will facilitate analysis of density as a
% function of z (which after our transformations, represents distance from
% the z-plane).
    sizeh1=size(h);
    sizeh2=sizeh1(1,1);
    for iii=1:sizeh2
        a=get(h(iii),'ZData');
        height=a(1,1);
        set(h(iii),'UserData',height);
        set(h(iii),'Tag','Vessel');
    end
end

% Track progress as vessel tracks are plotted.
VesselPlotProgress=i/tracknum
```

```
end

% If run-mode is for displaying a plot of the vessel network, then plot the
% reference plane if desired, and then end program.
if ~modetest
    if planetest
        [xyp, yyp]=meshgrid(xmin:(xmax-xmin)/10:xmax,ymin:(ymax-ymin)/10:ymax);
        zzp = 0 * xyp;
        surf(xyp,yyp,zzp,'FaceColor',[0 0 1],'EdgeColor',[0 0 0])
        hold on
    end
    daspect([1 1 1]);
    output='Finished Plotting Vessels'
    return
end

% If run-mode is for analyzing angle, plot a scatterplot of vessel angle
% with respect to distance from reference plane. Then, plot the cumulative
% probability distribution of vessel angle. Finally, save these figures,
% and the data that make up these tables as comma separated value text
% files, and end program.
if analysismode
    planarity(:,1)=planarity(:,1);
    xlim([min(planarity(:,1))-5 max(planarity(:,1))+5]);ylim([-5 95]);plot(planarity(:,1),
planarity(:,2), 'kd');hold on;
    title('Vessel Angle from Plane as a Function of Depth');
    xlabel('Depth (um)');
    ylabel('Angle (degrees)');
    hgsave(strcat(savedir, '\AngleProfile.fig'));
    csvwrite(strcat(savedir, '\AngleData.txt'),planarity);

    cumangle=[10 20 30 40 50 60 70 80 90]';
    plnsize=size(planarity);
    plnsize2=plnsize(1,1);
    for i=1:9
        cumangle(i,2)=sum(planarity(:,2)<cumangle(i,1));
    end
    cumangle(:,2)=cumangle(:,2)/plnsize2;
    cumangle=[0 0;cumangle];
    figure;plot(cumangle(:,1),cumangle(:,2));
    title('Cumulative Probability Distribution of Vessel Angle');
    xlabel('Angle (degrees)');
    ylabel('Cumulative Probability');
    hgsave(strcat(savedir, '\CumAngle.fig'));
    csvwrite(strcat(savedir, '\CumAngle.txt'),cumangle);
    output='Finished Angle Measurements'
    return
end

% If program has gotten to this line, then run-mode must be for analyzing
% density. Countours must now be drawn for the surface that bounds the
% volume.
```

```
[c h]=contour3(xdiamond,ydiamond,zdiamond,v,'b');
hold on
% Again, each contour is saved as a graphics object with handle h. For
% each of these unique handles, save tags marking these contours as
% belonging to the frame, and with tags that note the z-coordinate where
% contour was taken. These tags will facilitate analysis of density as a
% function of z (which after our transformations, represents distance from
% the z-plane).
sizeh1=size(h);
sizeh2=sizeh1(1,1);
for iii=1:sizeh2
    a=get(h(iii),'ZData');
    height=a(1,1);
    set(h(iii),'UserData',height);
    set(h(iii),'Tag','Frame');
end

% Make sure data aspect ratio is correct.
set(gca,'DataAspectRatio',[1 1 1]);

% Find every unique value of 'UserData' -- this should be the list of
% z-locations chosen for measurements of vessel density, as defined earlier
% with slice interval. These values are saved into the first column of areasav.
h=findobj;
a=get(h,'UserData');
a=cell2mat(a);
a=unique(a);
sizea1=size(a);
sizea2=sizea1(1,1);
areasav=a;
areasav(:,2)=0.*a;

% Measure the cross-sectional area of the frame and of the vessel network
% at each z-location
for ii=1:sizea2

% Zero the running-area counts, and open a new figure.
    cumarea=0;
    framearea=0;
    figure;hold on;

% Find all the contour objects for the frame at the current z-location. Use
% the x- and y- coordinates of these contours to determine cross-sectional
% area of the frame at this z-location.
    b=findobj('UserData',a(ii),'-and','Tag','Frame');
    sizeb1=size(b);
    sizeb2=sizeb1(1,1);
    for jj=1:sizeb2
        xtest=get(b(jj),'XData');
        ytest=get(b(jj),'YData');
        index=find(~isnan(xtest));
        xtest=xtest(index);
```

```
    ytest=ytest(index);
    framearea=framearea+polyarea(xtest,ytest);
% Plot cross-section of the frame in blue.
    fill(xtest,ytest,'b');
    hold on
end

% Find all the contour objects for the vessels at the current z-location. Use
% the x- and y- coordinates of these contours to determine cross-sectional
% area of the vessel network at this z-location.
    b=findobj('UserData',a(ii),'-and','Tag','Vessel');
    sizeb1=size(b);
    sizeb2=sizeb1(1,1);
    for jj=1:sizeb2
        xtest=get(b(jj),'XData');
        ytest=get(b(jj),'YData');
        index=find(~isnan(xtest));
        xtest=xtest(index);
        ytest=ytest(index);
% Plot cross-section of the vessel network in black.
        fill(xtest,ytest,'k');
        hold on
        cumarea=cumarea+polyarea(xtest,ytest);
    end

% Save an image of the cross-section of the frame and vessels at this
% z-location to enable verification of correct sectioning.
    axis([xmin xmax ymin ymax]);
    hgsave(strcat(savedir,'\Fig',int2str(ii)));
    close;

% Save the cross-sectional area of the frame and vessel network at this
% location into areasav.
    areasav(ii,2)=cumarea;
    areasav(ii,3)=framearea;

% Display the progress of the density calculation process.
    DensCalcProgress=ii/sizea2
end

% Save measurements of vessel area and frame area as a function of distance
% from the reference plane in comma separated value formatted text files.
areasav(:,1)=areasav(:,1);
csvwrite(strcat(savedir,'\VesselArea.txt'),areasav(:,1:2));
csvwrite(strcat(savedir,'\TotalArea.txt'),[areasav(:,1),areasav(:,3)]);
close

% Calculate the ratio of the cross-sectional area of the vessel network to
% the cross-sectional area of the frame at each z-location. When small
% slice interval is used, this is a good estimate of the fraction of space
% taken up by the vessel network (in other words, the vessel density) as a
% function of distance from the reference plane. This is saved into
```

```
% areasavfin as both a fraction and a percentage, and the entire table is
% saved as a comma separated value formatted text file.
index=find(areasav(:,3)>0);
areasavfin=areasav(index,:);
areasavfin(:,4)=areasavfin(:,2)./areasavfin(:,3);
areasavfin(:,5)=areasavfin(:,4)*100;
csvwrite(strcat(savedir,'\AllAreaData.txt'),areasavfin);

% Finally, this vessel density as a function of depth is plotted as a line
% graph, and saved to file.
figure;plot(areasavfin(:,1),areasavfin(:,5));
title('Vessel Density as a Function of Depth');
xlabel('Depth (um)');
ylabel('Vessel Density % (v/v)');
hgsave(strcat(savedir,'\DensityProfile.fig'));

% With that, the program is complete.
output='Finished Density Measurements'
```
